# Supplementary material for: Disease causing poverty: adapting the Onyx and Bullen social capital measurement tool for China
Source: PubMed Central journal article supplement (PMC6961236; doi:10.1186/s12889-020-8163-5), 2020-01-14
Supplement: 12889_2020_8163_MOESM1_ESM.pdf [file 12889_2020_8163_MOESM1_ESM.pdf]

Table 3 Factor structure of Chinese social capital measure and comparison of factor items

| Item                                                                                                                                   | Factors Loading from Rotated Component Matrix |       |       |       |       |       |       |       | Comparison        |                      |                                      |                         |
|----------------------------------------------------------------------------------------------------------------------------------------|-----------------------------------------------|-------|-------|-------|-------|-------|-------|-------|-------------------|----------------------|--------------------------------------|-------------------------|
|                                                                                                                                        |                                               |       |       |       |       |       |       |       | Current<br>study* | Onyx<br>Bullen[70]** | and<br>Raika<br>Abdulahad[71]<br>*** | O'Brien<br>[72]<br>**** |
|                                                                                                                                        | 1                                             | 2     | 3     | 4     | 5     | 6     | 7     | 8     | Factor            | Factor               | Factor                               | Factor                  |
| Do you feel part of the local geographic community where you work?                                                                     |                                               |       |       |       |       |       |       |       | 1                 | 1                    | 1                                    | -                       |
| Are your workmates also your friends?                                                                                                  |                                               |       |       |       |       |       |       |       | 1                 | 1                    | 1                                    | 1                       |
| Do you feel part of a team at work?                                                                                                    |                                               |       |       |       |       |       |       |       | 1                 | 1                    | 1                                    | 1                       |
| At work, do you take the initiative to do what needs to be done even if no one asks you to?                                            |                                               |       |       |       |       |       |       |       | 1                 | 5                    | 1                                    | 7                       |
| In the past week at work, have you helped a workmate even though it was not in your job description?                                   |                                               |       |       |       |       |       |       |       | 1                 | 5                    | 1                                    | 7                       |
| Have you attended a local community event in the past 6 months (e.g., village artistic performance, school concert, craft exhibition)? | .688                                          | .060  | .151  | .093  | .194  | .167  | -.071 | -.047 | 2                 | 2                    | 2                                    | 2                       |
| Are you an active member of a local organization or club (e.g., sport, craft, social club)?                                            | .737                                          | .067  | .128  | .170  | .120  | .019  | .033  | -.137 | 2                 | 2                    | 2                                    | 2                       |
| Are you on a management committee or organizing committee for any local/village group or organization?                                 | .647                                          | -.102 | -.055 | .245  | -.040 | -.146 | .133  | .163  | 2                 | 2                    | 2                                    | 2                       |
| In the past 3 years, have you ever joined a local community action to deal with an emergency?( e.g.,                                   | .728                                          | .011  | .044  | -.137 | .074  | .192  | -.187 | .125  | 2                 | 2                    | 2                                    | 2                       |

|                                                                                                                                                                                   |       |       |       |       |       |       |       |       |   |   |   |   |
|-----------------------------------------------------------------------------------------------------------------------------------------------------------------------------------|-------|-------|-------|-------|-------|-------|-------|-------|---|---|---|---|
| emergency office in your village or county)                                                                                                                                       |       |       |       |       |       |       |       |       |   |   |   |   |
| In the past 3 years, have you ever taken part in a local community project or working bee? ( e.g., labor union)                                                                   | .794  | .006  | -.034 | -.036 | .032  | .154  | -.067 | .086  | 2 | 2 | 2 | - |
| Have you ever been part of a project to organize a new service in your area (e.g., youth club, petition reception offices, children health care center, recreation for disabled)? | .724  | .004  | .095  | .149  | .000  | -.030 | .122  | -.056 | 2 | 2 | 2 | 2 |
| Do you agree that most people can be trusted?                                                                                                                                     | .048  | .709  | -.032 | .138  | .124  | .038  | .099  | .100  | 3 | 3 | 3 | 3 |
| If someone's car or electric motorcar breaks down (out of power)outside your house, do you invite them into your home to use the phone or charge it?                              | -.141 | .606  | .026  | .122  | .047  | .300  | .121  | .015  | 3 | 3 | 3 | - |
| Does your local community/ village feel like home?                                                                                                                                | .112  | .711  | .208  | .081  | -.147 | -.063 | .245  | .083  | 3 | 3 | - | 3 |
| Can you get help from friends when you need it?                                                                                                                                   | .002  | .508  | .392  | -.091 | -.024 | .286  | .101  | .236  | 3 | 4 | 3 | 5 |
| Do you feel valued by society?                                                                                                                                                    | .098  | .508  | .113  | .317  | .470  | -.021 | -.090 | -.099 | 3 | 7 | 6 | - |
| If you have only on day left in your life, are you satisfied with what your life has meant?                                                                                       | .005  | .621  | .016  | .215  | .362  | -.041 | -.079 | -.099 | 3 | 7 | 6 | 5 |
| If you were caring for a child and needed to go out for a while, would you ask a neighbor for help?                                                                               | -.067 | .337  | .389  | .102  | -.097 | .357  | -.037 | .378  | 4 | 4 | 3 | 4 |
| Have you visited a neighbor in the past week?                                                                                                                                     | .152  | .043  | .579  | .284  | .030  | -.029 | .095  | .293  | 4 | 4 | 3 | 4 |
| When you go shopping in your local area are you likely to run into friends and acquaintances?                                                                                     | -.024 | .077  | .618  | .164  | .251  | .120  | .241  | -.083 | 4 | 4 | 4 | - |
| In the past 6 months, have you done a favor for neighbors in illness or in need? (including mutual help)                                                                          | .166  | .119  | .680  | -.048 | .024  | .092  | -.211 | .053  | 4 | 4 | - | 4 |
| How many people did you talk to yesterday? 1                                                                                                                                      | .040  | .018  | .616  | .155  | .059  | .009  | .320  | .054  | 4 | 8 | 4 | 8 |
| Do you go outside your local community to visit your family or relatives?                                                                                                         | .190  | -.018 | .172  | .473  | -.040 | .353  | -.006 | .338  | 5 | 5 | - | - |

|                                                                                                                        |       |      |      |       |      |       |       |       |   |   |   |   |
|------------------------------------------------------------------------------------------------------------------------|-------|------|------|-------|------|-------|-------|-------|---|---|---|---|
| If you need information to make a life decision(or an important decision), do you know where to find that information? | .172  | .033 | .085 | .540  | .142 | .132  | .182  | .297  | 5 | 5 | 4 | - |
| If you disagree with what everyone else agreed on, would you feel free to speak out?                                   | .101  | .240 | .086 | .750  | .136 | -.022 | .034  | -.006 | 5 | 5 | 7 | - |
| If you have a dispute with your neighbors (e.g., over fences or dogs) are you willing to seek mediation?               | .049  | .309 | .158 | .645  | .015 | .208  | -.084 | .008  | 5 | 5 | 7 | 5 |
| Do you think that multiculturalism makes life in your area better?                                                     | .132  | .053 | .174 | .065  | .777 | .104  | .120  | .203  | 6 | 6 | 5 | 6 |
| Do you enjoy living among people of different lifestyles?                                                              | .149  | .118 | .026 | .076  | .812 | .141  | .077  | .170  | 6 | 6 | 5 | 6 |
| Do you help out a local group or organization as a volunteer?                                                          | .234  | .198 | .033 | .017  | .104 | .602  | .133  | .097  | 7 | 2 | - | 2 |
| Have you ever help to pick up rubbish in a public place?                                                               | .103  | .003 | .122 | .274  | .185 | .713  | .163  | -.128 | 7 | 5 | - | 7 |
| Do you feel safe walking down your street after dark?                                                                  | -.018 | .093 | .132 | .056  | .101 | .153  | .746  | -.006 | 8 | 3 | - | 3 |
| Does your area have a reputation for being a safe place?                                                               | -.028 | .473 | .095 | -.041 | .040 | .122  | .666  | .048  | 8 | 3 | - | 3 |
| In the past week, how many phone conversations have you had with friends and relatives?                                | .231  | .078 | .280 | .340  | .148 | -.029 | .047  | .451  | 9 | 8 | 4 | 8 |
| How often do you have lunch/dinner with other people outside your household?                                           | -.069 | .071 | .060 | .066  | .246 | -.008 | -.010 | .750  | 9 | 8 | 4 | 8 |

\*Factors in the current study. Factor1=Work Connections; Factor2= Participation in the Local Community; Factor3= Feelings of Trust and Self-value; Factor4= Neighborhood Connections; Factor5= Proactivity in a Social Context; Factor6= Tolerance of Diversity; Factor7= Voluntariness; Factor8= Feelings of Safety; Factor9= Friends Connections.

\*\* Factors in Onyx and Bullen's research. Factor1= Work Connections; Factor2= Participation in the Local Community; Factor3= Feelings of Trust and Safety; Factor4= Neighborhood Connections; Factor5= Social Agency or Proactivity in a Social Context; Factor6= Tolerance of Diversity; Factor7= Value of Life; Factor8= Family and Friends Connections.

\*\*\* Factors in Raika Abdulahad's study. Factor1= Work Connections; Factor2= Participation in the Local Community; Factor3= Family/Friends and Neighborhood Connections; Factor4= Feelings of Trust and Safety; Factor5= Value of Life; Factor6= Tolerance of Diversity; Factor7= Proactivity in a Social Context.

\*\*\*\* Factors in O'Brien's study. Factor1= Work Connections; Factor2= Formal Participation in the Community; Factor3= Feelings of Trust and Safety; Factor4= Neighborhood Connections; Factor5= Value of Life; Factor6= Tolerance of Diversity; Factor7= Proactivity in a Social Context; Factor8= Others.
